# Supplementary figures and images for: Epigenetic Regulation of Processes Related to High Level of Fibroblast Growth Factor 21 in Obese Subjects
Source: MDPI journal article supplement (doi:10.3390/genes12020307), 2021-02-21

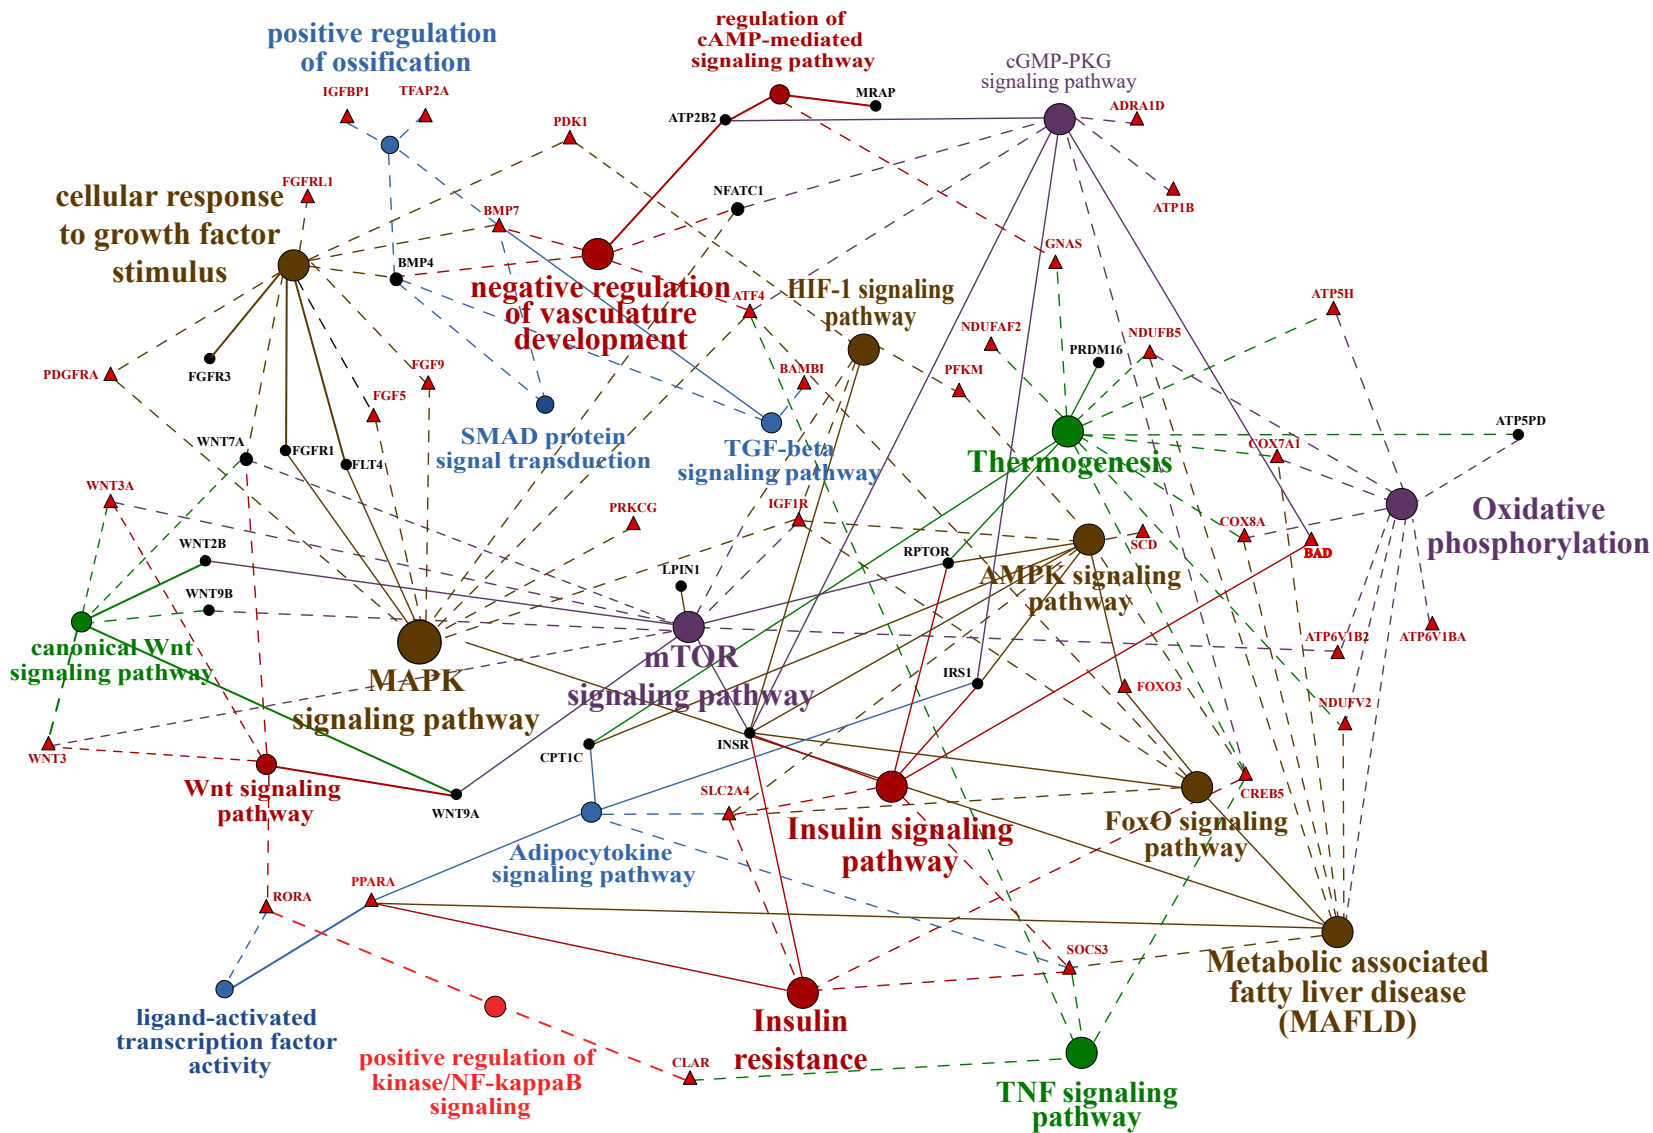

Supplement: s1 [file s1]
